# Supplementary material for: Global epidemiology ofTrichomonas vaginalis
Source: HighWire-hosted journal article supplement (doi:10.1136/sextrans-2013-051075), 2013-06-06
Supplement: sextrans-2013-051075supp.pdf [file sextrans-2013-051075supp.pdf]

## Weblink References

- w1 Cotch MF, Pastorek JG, 2nd, Nugent RP, et al. Trichomonas vaginalis associated with low birth weight and preterm delivery. The Vaginal Infections and Prematurity Study Group. *Sex Transm Dis.* 1997;**24**(6):353-60.
- w2 Paisarntantiwong R, Brockmann S, Clarke L, et al. The relationship of vaginal trichomoniasis and pelvic inflammatory disease among women colonized with Chlamydia trachomatis. *Sex Transm Dis.* 1995;**22**(6):344-7.
- w3 Nye MB, Schwebke JR, Body BA. Comparison of APTIMA Trichomonas vaginalis transcription-mediated amplification to wet mount microscopy, culture, and polymerase chain reaction for diagnosis of trichomoniasis in men and women. *Am J Obstet Gynecol.* 2009;**200**(2):188 e1-7.
- w4 Schwebke JR, Lawing LF. Improved detection by DNA amplification of Trichomonas vaginalis in males. *J Clin Microbiol.* 2002;**40**(10):3681-3.
- w5 Cudmore SL, Delgaty KL, Hayward-McClelland SF, et al. Treatment of infections caused by metronidazole-resistant Trichomonas vaginalis. *Clin Microbiol Rev.* 2004;**17**(4):783-93.
- w6 Conrad M, Zubacova Z, Dunn LA, et al. Microsatellite polymorphism in the sexually transmitted human pathogen Trichomonas vaginalis indicates a genetically diverse parasite. *Mol Biochem Parasitol.* 2011;**175**(1):30-8.
- w7 Meade JC, de Mestral J, Stiles JK, et al. Genetic diversity of Trichomonas vaginalis clinical isolates determined by EcoRI restriction fragment length polymorphism of heat-shock protein 70 genes. *Am J Trop Med Hyg.* 2009;**80**(2):245-51.
- w8 Brotman RM, Bradford LL, Conrad M, et al. Association Between Trichomonas vaginalis and Vaginal Bacterial Community Composition Among Reproductive-Age Women. *Sex Transm Dis.* 2012;**39**(10):807-12.

- w9 Lash JJ, Belt E. A cultural method for the diagnosis of trichomonad infestations. *Am J Obstet Gynecol.* 1949;**57**(5):980-3.
- w10 Wendel KA, Erbeding EJ, Gaydos CA, et al. Use of urine polymerase chain reaction to define the prevalence and clinical presentation of *Trichomonas vaginalis* in men attending an STD clinic. *Sex Transm Infect.* 2003;**79**(2):151-3.
- w11 Kaydos-Daniels SC, Miller WC, Hoffman I, et al. The use of specimens from various genitourinary sites in men, to detect *Trichomonas vaginalis* infection. *J Infect Dis.* 2004;**189**(10):1926-31.
- w12 Munson KL, Napierala M, Munson E, et al. *Trichomonas vaginalis* Male Screening with Transcription-mediated Amplification in a Community of High Sexually-transmitted Infection Prevalence. *J Clin Microbiol.* Published Online First: 24 October 2012. doi: 10.1128/JCM.02526-12
- w13 Joyner JL, Douglas JM, Jr., Ragsdale S, et al. Comparative prevalence of infection with *Trichomonas vaginalis* among men attending a sexually transmitted diseases clinic. *Sex Transm Dis.* 2000;**27**(4):236-40.
- w14 Torok MR, Miller WC, Hobbs MM, et al. The association between oral contraceptives, depot-medroxyprogesterone acetate, and trichomoniasis. *Sex Transm Dis.* 2009;**36**(6):336-40.
- w15 Verteramo R, Calzolari E, Degener AM, et al. *Trichomonas vaginalis* infection: risk indicators among women attending for routine gynecologic examination. *J Obstet Gynaecol Res.* 2008;**34**(2):233-7.
- w16 Van Der Pol B, Williams JA, Orr DP, et al. Prevalence, incidence, natural history, and response to treatment of *Trichomonas vaginalis* infection among adolescent women. *J Infect Dis.* 2005;**192**(12):2039-44.

- w17 Schwebke JR, Rompalo A, Taylor S, et al. Re-evaluating the treatment of nongonococcal urethritis: emphasizing emerging pathogens--a randomized clinical trial. *Clin Infect Dis*. 2011;**52**(2):163-70.
- w18 Brabin L. Interactions of the female hormonal environment, susceptibility to viral infections, and disease progression. *AIDS Patient Care STDS*. 2002;**16**(5):211-21.
- w19 Kelley CF, Rosenberg ES, O'Hara BM, et al. Prevalence of urethral *Trichomonas vaginalis* in black and white men who have sex with men. *Sex Transm Dis*. 2012;**39**(9):739.
- w20 Alderete JF, Provenzano D. The vagina has reducing environment sufficient for activation of *Trichomonas vaginalis* cysteine proteinases. *Genitourin Med*. 1997;**73**(4):291-6.
- w21 Ford LC, Hammill HA, DeLange RJ, et al. Determination of estrogen and androgen receptors in *Trichomonas vaginalis* and the effects of antihormones. *Am J Obstet Gynecol*. 1987;**156**(5):1119-21.
- w22 Fournier A, Boutron-Ruault MC, Clavel-Chapelon F. Breast cancer and hormonal therapy in postmenopausal women. *N Engl J Med*. 2009;**360**(22):2366; author reply -7.
- w23 Pillay A, Lewis J, Ballard RC. Evaluation of Xenostrip-Tv, a rapid diagnostic test for *Trichomonas vaginalis* infection. *J Clin Microbiol*. 2004;**42**(8):3853-6.
- w24 Wiese W, Patel SR, Patel SC, et al. A meta-analysis of the Papanicolaou smear and wet mount for the diagnosis of vaginal trichomoniasis. *Am J Med*. 2000;**108**(4):301-8.
- w25 Patil MJ, Nagamoti JM, Metgud SC. Diagnosis of *Trichomonas Vaginalis* from Vaginal Specimens by Wet Mount Microscopy, In Pouch TV Culture System, and PCR. *J Glob Infect Dis*. 2012;**4**(1):22-5.
- w26 Kaydos SC, Swygard H, Wise SL, et al. Development and validation of a PCR-based enzyme-linked immunosorbent assay with urine for use in clinical research settings to detect *Trichomonas vaginalis* in women. *J Clin Microbiol*. 2002;**40**(1):89-95.

- w27 Hobbs MM, Kazembe P, Reed AW, et al. *Trichomonas vaginalis* as a cause of urethritis in Malawian men. *Sex Transm Dis.* 1999;**26**(7):381-7.
- w28 Hegazy MM, El-Tantawy NL, Soliman MM, et al. Performance of rapid immunochromatographic assay in the diagnosis of *Trichomoniasis vaginalis*. *Diagn Microbiol Infect Dis.* 2012;**74**(1):49-53.
- w29 Kurth A, Whittington WL, Golden MR, et al. Performance of a new, rapid assay for detection of *Trichomonas vaginalis*. *J Clin Microbiol.* 2004;**42**(7):2940-3.
- w30 Chapin K, Andrea S. APTIMA(R) *Trichomonas vaginalis*, a transcription-mediated amplification assay for detection of *Trichomonas vaginalis* in urogenital specimens. *Expert Rev Mol Diagn.* 2011;**11**(7):679-88.
